# Supplementary material for: Lithium nickel borides: evolution of [NiB] layers driven by Li pressure
Source: Royal Society of Chemistry journal article supplement (doi:10.1039/d0qi01150a), 2020-11-25
Supplement: d0qi01150a1.pdf [file d0qi01150a1.pdf]

## **Lithium Nickel Borides: evolution of [NiB] layers driven by Li pressure**

Volodymyr Gvozdetyski,<sup>a</sup> Yang Sun,<sup>d</sup> Xin Zhao,<sup>b</sup> Gourab Bhaskar,<sup>a</sup> Scott L. Carnahan,<sup>a,b</sup> Colin P. Harmer,<sup>a,b</sup> Feng Zhang,<sup>b</sup> Raquel A. Ribeiro,<sup>c</sup> Paul C. Canfield,<sup>b,c</sup> Aaron J. Rossini,<sup>a,b</sup> Cai-Zhuang Wang,<sup>b,c</sup> Kai-Ming Ho,<sup>c</sup> Julia V. Zaikina<sup>a</sup>

<sup>a</sup> *Department of Chemistry, Iowa State University, Ames, Iowa 50011, United States*

<sup>b</sup> *Ames Laboratory, US DOE, Iowa State University, Ames, Iowa 50011, United States*

<sup>c</sup> *Department of Physics and Astronomy, Iowa State University, Ames, Iowa 50011, United States*

<sup>d</sup> *Department of Applied Physics and Applied Mathematics, Columbia University, New York, NY, 10027, USA*

## **Supporting Information**

## Table of Contents

| Content                                                                                                                               | Page no. |
|---------------------------------------------------------------------------------------------------------------------------------------|----------|
| Table S1. Experimental details and crystallographic data for two structure models of the $RT\text{-Li}_{1+x}\text{NiB}$               | S3       |
| Table S2. Atomic coordinates of the $RT(m)\text{-Li}_{1+x}\text{NiB}$ phase at 295 K                                                  | S4       |
| Table S3. Atomic coordinates of the $RT(m)\text{-Li}_{1+x}\text{NiB}$ phase at 100 K                                                  | S5       |
| Table S4. Experimental details and crystallographic data for two structure models of the $HT\text{-Li}_{1+y}\text{NiB}$               | S6       |
| Table S5. Atomic coordinates of the $HT(m)\text{-Li}_{1+y}\text{NiB}$ phase at 295 K                                                  | S7       |
| Table S6. Atomic coordinates of the $HT(m)\text{-Li}_{1+y}\text{NiB}$ phase at 100 K                                                  | S8       |
| Figure S1. Structural relationship: Li, $\text{Ni}_2\text{B}$ , $\text{LiNi}_3\text{B}_{1.8}$ , $RT\text{-LiNiB}$ , $HT\text{-LiNiB}$ | S9       |
| Figure S2. Optimization of the synthesis of $RT\text{-Li}_{1+x}\text{NiB}$                                                            | S10      |
| Figure S3. PXRD pattern of $HT\text{-Li}_{1+y}\text{NiB}$ : peaks of the superstructure                                               | S11      |
| Figure S4-S5. Rietveld refinement plot of $RT(m)\text{-Li}_{1+x}\text{NiB}$ ( $P2_1/c$ )                                              | S12-S13  |
| Figure S6-S7. Rietveld refinement plot of $RT(t)\text{-Li}_{1+x}\text{NiB}$ ( $P1$ )                                                  | S14-S15  |
| Figure S8-S9. Rietveld refinement plot of $HT(m)\text{-Li}_{1+x}\text{NiB}$ ( $P2_1/c$ )                                              | S16-S17  |
| Figure S10-S11. Rietveld refinement plot of $HT(t)\text{-Li}_{1+x}\text{NiB}$ ( $P1$ )                                                | S18-S19  |
| Table S7. Atomic coordinates of the distorted $HT\text{-LiNiB}$ phase at 616 K                                                        | S20      |
| Figure S12. Li-B bonds in the structures of $RT\text{-}$ and $HT\text{-}$ polymorphs                                                  | S21      |
| Figure S13. <i>In-situ</i> X-ray diffraction patterns of $RT\text{-LiNiB}$ and $HT\text{-LiNiB}$                                      | S22      |
| Figure S14. Evolution of $HT\text{-Li}_{1+y}\text{NiB}$ in air: PXRD patterns                                                         | S23      |
| Figure S15. Magnetic properties                                                                                                       | S24      |

**Table S1.** Experimental details and crystallographic data for two structure models of the  $RT$ - $\text{Li}_{1+x}\text{NiB}$  structure: monoclinic  $RT(m)$ , derived from the parent  $RT(m)$ - $\text{LiNiB}$ , and triclinic  $RT(t)$  with extra Li atoms within the layer. Rietveld refinement was performed on data collected using high resolution synchrotron powder X-ray diffraction (11-BM-B APS).

| Empirical formula     | $RT(m)\text{-Li}_{1+x}\text{NiB}^*$ |            | $RT(t)\text{-Li}_{1+x}\text{NiB}^{**}$ |             |
|-----------------------|-------------------------------------|------------|----------------------------------------|-------------|
| Formula weight, g/mol | 76.45                               |            | 77.61                                  |             |
| Space group, $Z$      | $P2_1/c$ , 16                       |            | $P1$ , 48                              |             |
| Cell parameters:      |                                     |            |                                        |             |
| $a$ , Å               | 18.277(1)                           | 18.209(1)  | 18.2763(4)                             | 18.2088(4)  |
| $b$ , Å               | 4.86606(5)                          | 4.86137(3) | 4.86589(3)                             | 4.86134(3)  |
| $c$ , Å               | 6.1818(2)                           | 6.1754(2)  | 18.5447(5)                             | 18.5264(4)  |
| $\alpha$ , °          |                                     |            | 89.9810(6)                             | 89.9808(9)  |
| $\beta$ , °           | 107.623(1)                          | 107.542(1) | 107.6202(9)                            | 107.5434(9) |
| $\gamma$ , °          |                                     |            | 90.056(2)                              | 90.067(2)   |
| $V$ , Å <sup>3</sup>  | 524.00(2)                           | 521.23(1)  | 1571.82(3)                             | 1563.67(3)  |
| Temperature, K        | 295                                 | 100        | 295                                    | 100         |
| Wavelength, Å         | $\lambda = 0.412815$                |            |                                        |             |
| Step scan             | 0.001                               |            |                                        |             |
| $2\theta^\circ$ range | 1-50                                |            |                                        |             |
| Program               | GSAS II                             |            |                                        |             |
| $R_B$                 | 0.15                                | 0.15       | 0.15                                   | 0.14        |
| $R_P$                 | 0.13                                | 0.12       | 0.13                                   | 0.12        |
| $G.O.F.$              | 4.08                                | 3.82       | 3.88                                   | 3.64        |

\* – Further details can be obtained from Cambridge Crystallographic Data Centre/FIZ Karlsruhe deposition service on quoting the depository number CSD-2031390 (100 K) and CSD-2031382 (295 K).

\*\* – Further details can be obtained from Cambridge Crystallographic Data Centre/FIZ Karlsruhe deposition service on quoting the depository number CSD-2031387 (100 K) and CSD-2031379 (295 K).

**Table S2.** Atomic coordinates and isotropic equivalent displacement parameters of the  $RT(m)$ - $\text{Li}_{1+x}\text{NiB}$  phase. Refined parameters based on synchrotron powder X-ray diffraction data at 295 K are listed. The coordinates of Li and B atoms were not refined but fixed to the values previously determined for  $RT^*(m)$ -LiNiB.

| Site                                                                                                                                                                                                           | Wyckoff site | $x$       | $y$       | $z$       | $U_{\text{iso}}, \text{\AA}^2 \times 10^2$ |
|----------------------------------------------------------------------------------------------------------------------------------------------------------------------------------------------------------------|--------------|-----------|-----------|-----------|--------------------------------------------|
| $RT(m)$ - $\text{Li}_{1+x}\text{NiB}$ ( $mP48$ , $P2_1/c$ , $a = 18.277(1)$ , $b = 4.86606(5)$ , $c = 6.1818(2)$ \AA, $\beta = 107.623(1)^\circ$ ,<br>$Z = 16$ , $R_p = 0.13$ , $R_B = 0.15$ , $Goof = 4.08$ ) |              |           |           |           |                                            |
| Ni1                                                                                                                                                                                                            | $4e$         | 0.0013(1) | -0.001(3) | 0.2277(3) | 1.08(2)                                    |
| Ni2                                                                                                                                                                                                            | $4e$         | 0.2511(1) | -0.002(4) | 0.2919(4) | 1.08(2)                                    |
| Ni3                                                                                                                                                                                                            | $4e$         | 0.5007(1) | 0.001(3)  | 0.2946(4) | 1.08(2)                                    |
| Ni4                                                                                                                                                                                                            | $4e$         | 0.7483(1) | -0.003(4) | 0.2880(4) | 1.08(2)                                    |
| B1                                                                                                                                                                                                             | $4e$         | 0.01075   | 0.32589   | 0.01077   | 3.3(2)                                     |
| B2                                                                                                                                                                                                             | $4e$         | 0.26075   | 0.17411   | 0.01077   | 3.3(2)                                     |
| B1                                                                                                                                                                                                             | $4e$         | 0.51075   | 0.17411   | 0.01077   | 3.3(2)                                     |
| B2                                                                                                                                                                                                             | $4e$         | 0.76075   | 0.17411   | 0.01077   | 3.3(2)                                     |
| Li1                                                                                                                                                                                                            | $4e$         | 0.13076   | 0.25407   | 0.37955   | 3.3(2)                                     |
| Li2                                                                                                                                                                                                            | $4e$         | 0.38076   | 0.25407   | 0.37955   | 3.3(2)                                     |
| Li2                                                                                                                                                                                                            | $4e$         | 0.63076   | 0.25407   | 0.37955   | 3.3(2)                                     |
| Li3                                                                                                                                                                                                            | $4e$         | 0.88076   | 0.25407   | 0.37955   | 3.3(2)                                     |

**Table S3.** Atomic coordinates and isotropic equivalent displacement parameters of the  $RT(m)$ - $\text{Li}_{1+x}\text{NiB}$  phase. Refined parameters based on synchrotron powder X-ray diffraction data at 100 K are listed. The coordinates of Li and B atoms were not refined but fixed to the values previously determined for  $RT^*(m)$ -LiNiB.

| Site                                                                                                                                                                                                       | Wyckoff site | $x$       | $y$       | $z$       | $U_{\text{iso}}, \text{\AA}^2 \times 10^2$ |
|------------------------------------------------------------------------------------------------------------------------------------------------------------------------------------------------------------|--------------|-----------|-----------|-----------|--------------------------------------------|
| $RT(m)$ - $\text{Li}_{1+x}\text{NiB}$ ( $mP48$ , $P2_1/c$ , $a = 18.209(1)$ , $b = 4.86137(3)$ , $c = 6.1754(2)$ \AA, $\beta = 107.542(1)^\circ$ , $Z = 8$ , $R_p = 0.12$ , $R_B = 0.15$ , $Goof = 3.82$ ) |              |           |           |           |                                            |
| Ni1                                                                                                                                                                                                        | $4e$         | 0.0009(1) | -0.001(3) | 0.2246(4) | 1.07(2)                                    |
| Ni2                                                                                                                                                                                                        | $4e$         | 0.2509(2) | -0.001(3) | 0.2935(4) | 1.07(2)                                    |
| Ni3                                                                                                                                                                                                        | $4e$         | 0.5005(1) | 0.002(3)  | 0.2930(5) | 1.07(2)                                    |
| Ni4                                                                                                                                                                                                        | $4e$         | 0.7484(2) | -0.003(3) | 0.2840(5) | 1.08(2)                                    |
| B1                                                                                                                                                                                                         | $4e$         | 0.01075   | 0.32589   | 0.01077   | 3.2(2)                                     |
| B2                                                                                                                                                                                                         | $4e$         | 0.26075   | 0.17411   | 0.01077   | 3.2(2)                                     |
| B1                                                                                                                                                                                                         | $4e$         | 0.51075   | 0.17411   | 0.01077   | 3.2(2)                                     |
| B2                                                                                                                                                                                                         | $4e$         | 0.76075   | 0.17411   | 0.01077   | 3.2(2)                                     |
| Li1                                                                                                                                                                                                        | $4e$         | 0.13076   | 0.25407   | 0.37955   | 3.2(2)                                     |
| Li2                                                                                                                                                                                                        | $4e$         | 0.38076   | 0.25407   | 0.37955   | 3.2(2)                                     |
| Li2                                                                                                                                                                                                        | $4e$         | 0.63076   | 0.25407   | 0.37955   | 3.2(2)                                     |
| Li3                                                                                                                                                                                                        | $4e$         | 0.88076   | 0.25407   | 0.37955   | 3.2(2)                                     |

**Table S4.** Experimental details and crystallographic data for two structure models of *HT*-Li<sub>1+y</sub>NiB: the idealized monoclinic *HT(m)* and triclinic *HT(t)* with extra Li atoms within the layer. Rietveld refinement was performed on data collected using high resolution synchrotron powder X-ray diffraction (11-BM-B APS).

| Empirical formula         | <i>HT(m)</i> -Li <sub>1+y</sub> NiB*   |            | <i>HT(t)</i> -Li <sub>1+y</sub> NiB** |            |
|---------------------------|----------------------------------------|------------|---------------------------------------|------------|
| Formula weight, g/mol     | 76.45                                  |            | 76.88                                 |            |
| Space group, <i>Z</i>     | <i>P</i> 2 <sub>1</sub> / <i>c</i> , 8 |            | <i>P</i> 1, 32                        |            |
| Cell parameters:          |                                        |            |                                       |            |
| <i>a</i> , Å              | 3.92591(7)                             | 3.92183(6) | 7.8521(1)                             | 7.8438(1)  |
| <i>b</i> , Å              | 7.5593(1)                              | 7.5492(1)  | 15.1187(2)                            | 15.0985(3) |
| <i>c</i> , Å              | 8.8181(2)                              | 8.7951(1)  | 8.8181(1)                             | 8.7952(2)  |
| $\alpha$ , °              |                                        |            | 89.9067(8)                            | 89.8937(8) |
| $\beta$ , °               | 92.6245(7)                             | 92.9962(6) | 92.6269(5)                            | 92.9992(6) |
| $\gamma$ , °              |                                        |            | 90.0010(6)                            | 90.0013(6) |
| <i>V</i> , Å <sup>3</sup> | 261.42(1)                              | 260.04(1)  | 1045.71(4)                            | 1040.19(5) |
| Temperature, K            | 295                                    | 100        | 295                                   | 100        |
| Wavelength, Å             | $\lambda = 0.412818$                   |            |                                       |            |
| Step scan                 | 0.001                                  |            |                                       |            |
| 2 $\theta^\circ$ range    | 1-50                                   |            |                                       |            |
| Program                   | GSAS II                                |            |                                       |            |
| <i>R<sub>B</sub></i>      | 0.16                                   | 0.16       | 0.12                                  | 0.14       |
| <i>R<sub>P</sub></i>      | 0.11                                   | 0.12       | 0.10                                  | 0.12       |
| <i>G.O.F.</i>             | 3.46                                   | 3.44       | 2.98                                  | 3.32       |

\* – Further details can be obtained from Cambridge Crystallographic Data Centre/FIZ Karlsruhe deposition service on quoting the depository number CSD-2031389 (100 K) and CSD-2031381 (295 K).

\*\* – Further details can be obtained from Cambridge Crystallographic Data Centre/FIZ Karlsruhe deposition service on quoting the depository number CSD-2031386 (100 K) and CSD-2031377 (295 K).

**Table S5.** Atomic coordinates and isotropic equivalent displacement parameters of the  $HT(m)$ - $Li_{1+y}NiB$  phase. Refined parameters based on synchrotron powder X-ray diffraction data at 295 K are listed. The coordinates of Li and B atoms were not refined but fixed to the values obtained from the analysis of interatomic distances and residual electron density peaks.

| Site                                                                                                                                 | Wyckoff site | $x$       | $y$       | $z$       | $U_{iso}, \text{\AA}^2 \times 10^2$ |
|--------------------------------------------------------------------------------------------------------------------------------------|--------------|-----------|-----------|-----------|-------------------------------------|
| $HT(m)$ - $Li_{1+y}NiB$ ( $mP24$ , $P2_1/c$ , $a = 3.92591(7)$ , $b = 7.5593(1)$ , $c = 8.8181(2)$ \AA, $\beta = 92.6245(7)^\circ$ , |              |           |           |           |                                     |
| $Z = 8$ , $R_p = 0.11$ , $R_B = 0.16$ , $Goof = 3.46$ )                                                                              |              |           |           |           |                                     |
| Ni1                                                                                                                                  | $4e$         | 0.1177(3) | 0.7522(1) | 0.2419(2) | 0.91(2)                             |
| Ni2                                                                                                                                  | $4e$         | 0.3789(3) | 0.4560(1) | 0.2544(2) | 0.91(2)                             |
| B1                                                                                                                                   | $4e$         | 0.12178   | 0.00862   | 0.25223   | 3.8(2)                              |
| B2                                                                                                                                   | $4e$         | 0.38214   | 0.18698   | 0.25598   | 3.8(2)                              |
| Li1                                                                                                                                  | $2a$         | 0         | 0         | 0         | 3.8(2)                              |
| Li2                                                                                                                                  | $2c$         | 0         | 0         | 1/2       | 3.8(2)                              |
| Li3                                                                                                                                  | $4e$         | 0.50195   | 0.25063   | 0.00780   | 3.8(2)                              |

**Table S6.** Atomic coordinates and isotropic equivalent displacement parameters of the  $HT(m)$ - $Li_{1+y}NiB$  phase. Refined parameters based on synchrotron powder X-ray diffraction data at 100 K are listed.

| Site                                                                                                                                                                                     | Wyckoff site | $x$       | $y$       | $z$       | $U_{iso}, \text{\AA}^2 \times 10^2$ |
|------------------------------------------------------------------------------------------------------------------------------------------------------------------------------------------|--------------|-----------|-----------|-----------|-------------------------------------|
| $HT-Li_{1+y}NiB$ ( $mP24$ , $P2_1/c$ , $a = 3.92183(6)$ , $b = 7.5492(1)$ , $c = 8.7951(1)$ \AA, $\beta = 92.9962(6)^\circ$ ,<br>$Z = 8$ , $R_p = 0.12$ , $R_B = 0.16$ , $Goof = 3.44$ ) |              |           |           |           |                                     |
| Ni1                                                                                                                                                                                      | $4e$         | 0.1167(3) | 0.7500(1) | 0.2388(1) | 0.68(2)                             |
| Ni2                                                                                                                                                                                      | $4e$         | 0.3783(3) | 0.4547(1) | 0.2535(2) | 0.68(2)                             |
| B1                                                                                                                                                                                       | $4e$         | 0.12178   | 0.00862   | 0.25223   | 3.5(2)                              |
| B2                                                                                                                                                                                       | $4e$         | 0.38214   | 0.18698   | 0.25598   | 3.5(2)                              |
| Li1                                                                                                                                                                                      | $2a$         | 0         | 0         | 0         | 3.5(2)                              |
| Li2                                                                                                                                                                                      | $2c$         | 0         | 0         | 1/2       | 3.5(2)                              |
| Li3                                                                                                                                                                                      | $4e$         | 0.50195   | 0.25063   | 0.00780   | 3.5(2)                              |



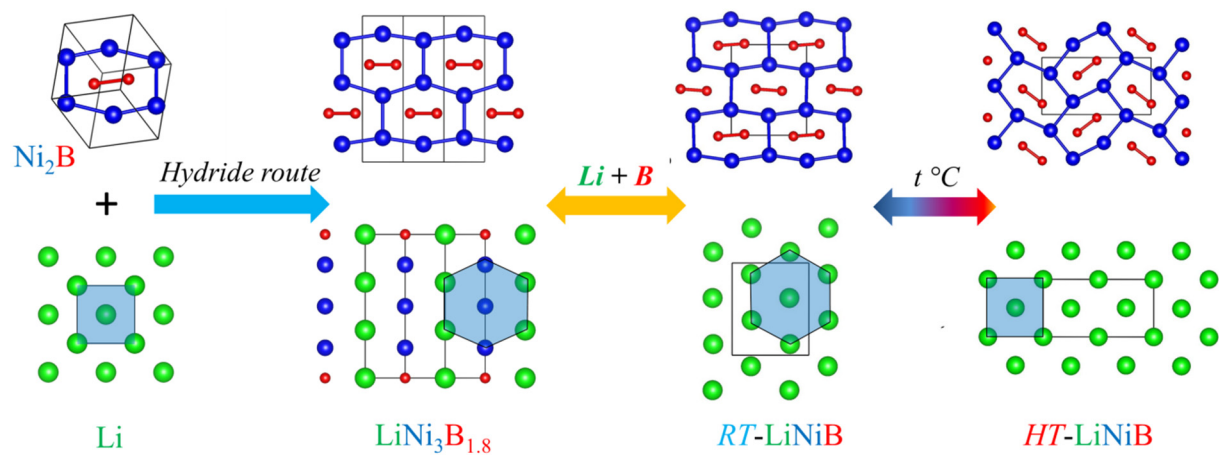

**Figure S1.** Structural relationship between Li (metal),  $\text{Ni}_2\text{B}$ ,  $\text{LiNi}_3\text{B}_{1.8}$ ,  $\text{RT-LiNiB}$ ,  $\text{HT-LiNiB}$ .

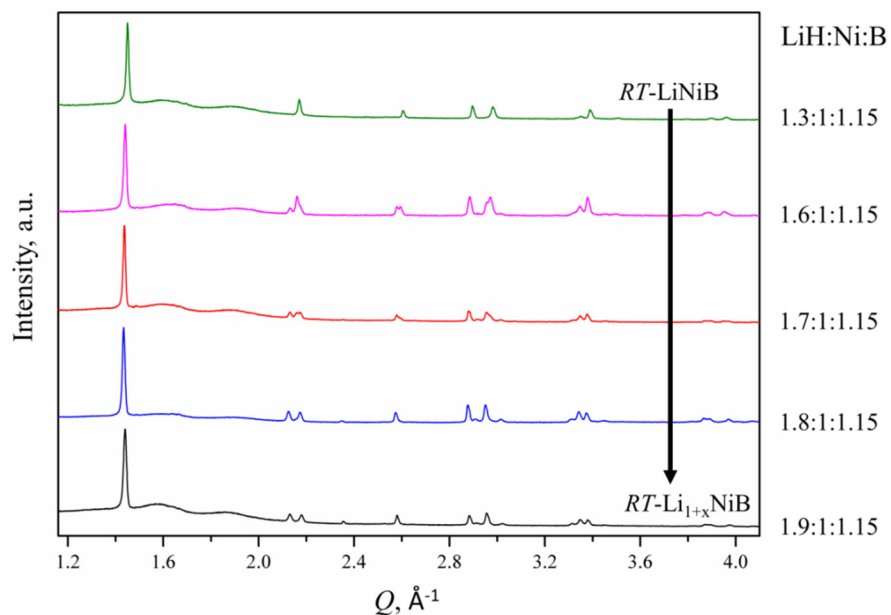

**Figure S2.** Comparison of X-ray powder diffraction patterns for the samples with the increasing of Li content in loading LiH:Ni:B compositions. Measurements were done in holders for air-sensitive samples and it contributed to the “amorphous” background at  $\sim 1.6 \text{ \AA}^{-1} Q$  and  $1.9 \text{ \AA}^{-1} Q$ . With the increasing of LiH content fraction of  $RT\text{-Li}_{1+x}\text{NiB}$  increases and reaches maximum in the sample with LiH:Ni:B = 1.9:1:1.15 loading composition.

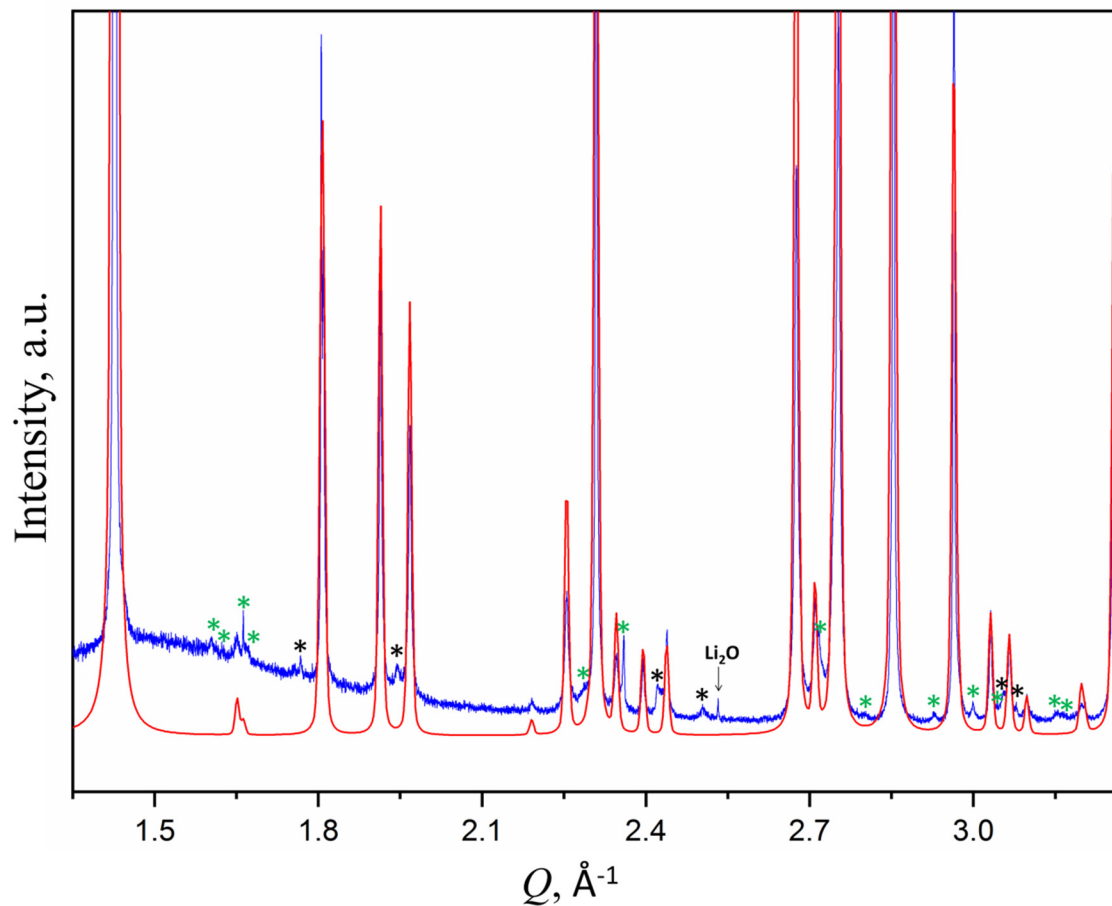

**Figure S3.** Experimental synchrotron X-ray powder pattern of  $HT\text{-Li}_{1+y}\text{NiB}$  and simulated pattern  $HT(m)\text{-Li}_{1+y}\text{NiB}$  ( $P2_1/c$ ). Weak satellite peaks that can be accounted by the supercell  $HT(t)\text{-Li}_{1+y}\text{NiB}$  ( $P1$ ) are marked with green stars (\*), those peaks that cannot be accounted by the supercell denoted with black stars.

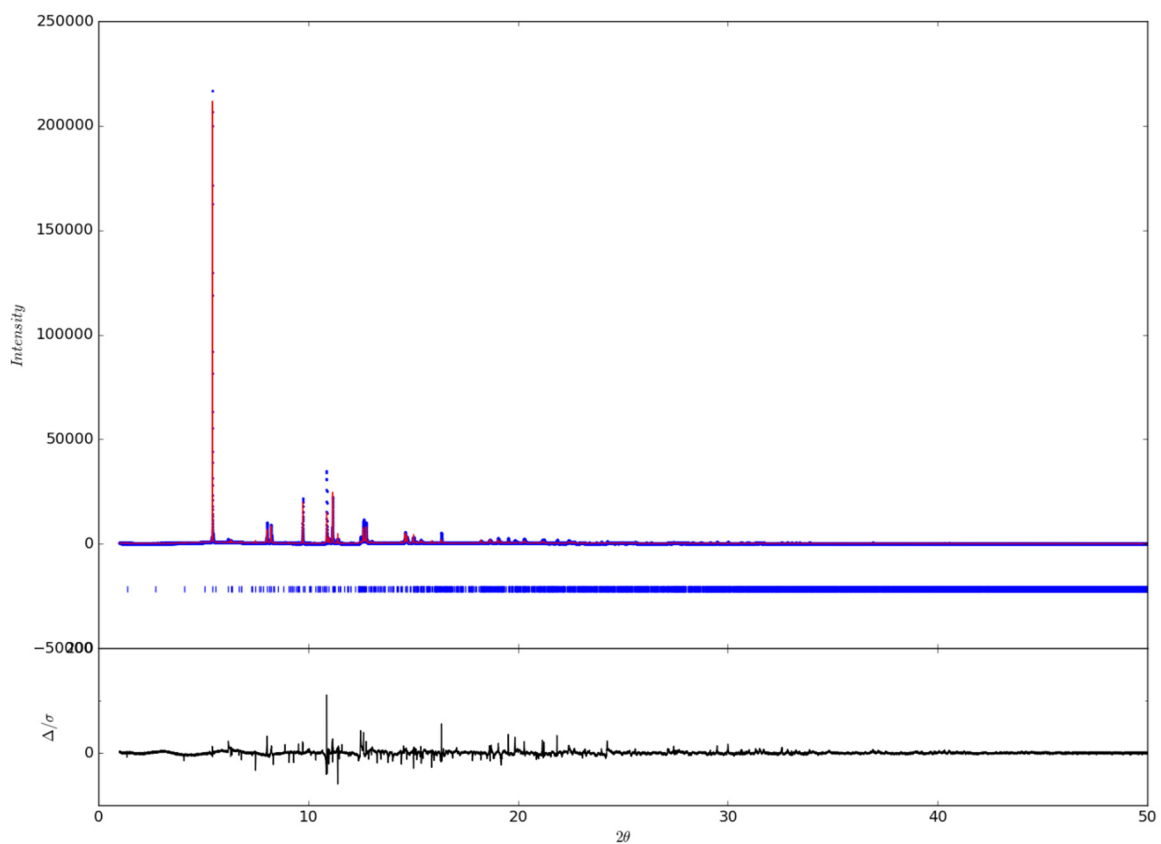

**Figure S4.** Rietveld refinement plot of synchrotron X-ray powder diffractogram of  $RT(m)$ - $\text{Li}_{1+x}\text{NiB}$  ( $P2_1/c$ ) collected at 295 K (experimental powder pattern is in blue, calculated – in red, difference – in black,  $R_B = 0.15$ ,  $R_p = 0.13$ ,  $G.O.F. = 4.08$ ).

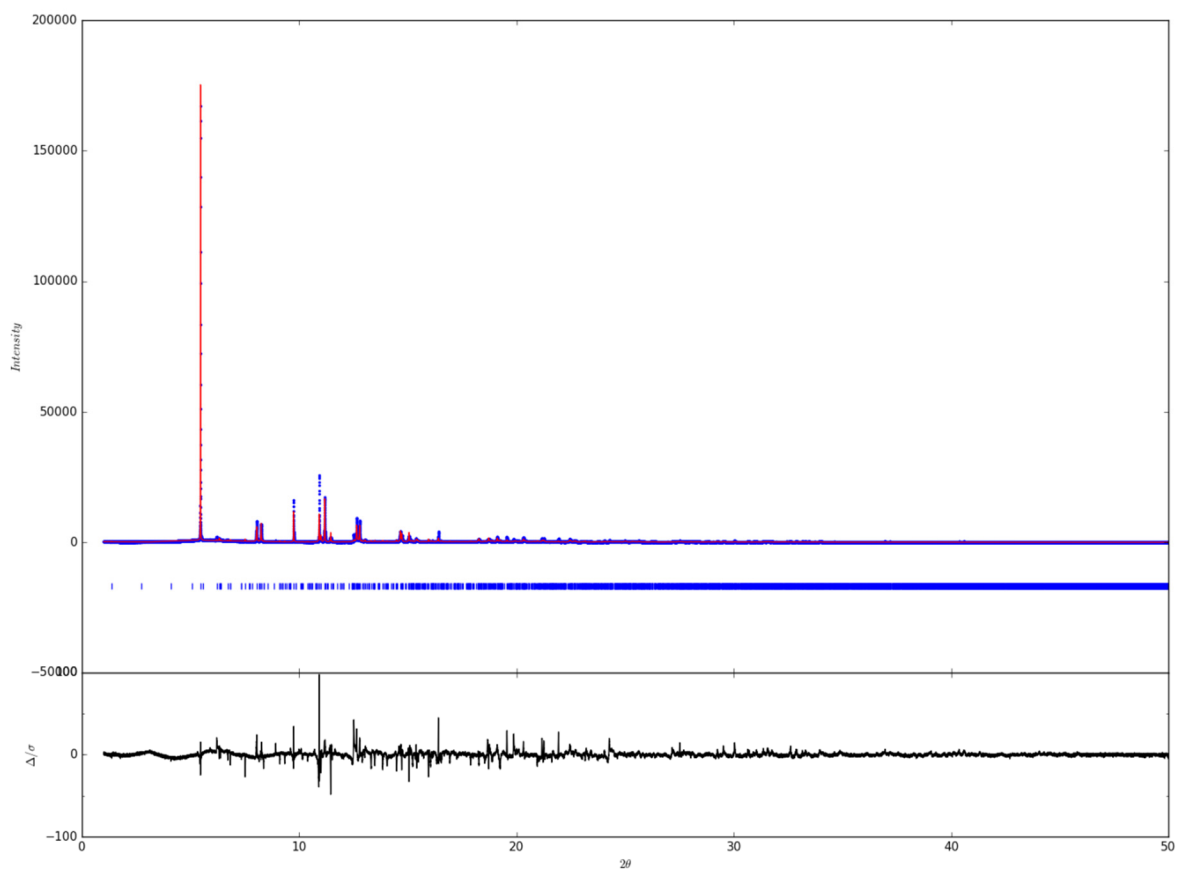

**Figure S5.** Rietveld refinement plot of synchrotron X-ray powder diffractogram of  $RT(m)$ - $\text{Li}_{1+x}\text{NiB}$  ( $P2_1/c$ ) collected at 100 K (experimental powder pattern is in blue, calculated – in red, difference – in black,  $R_B = 0.15$ ,  $R_p = 0.12$ ,  $G.O.F. = 3.82$ ).

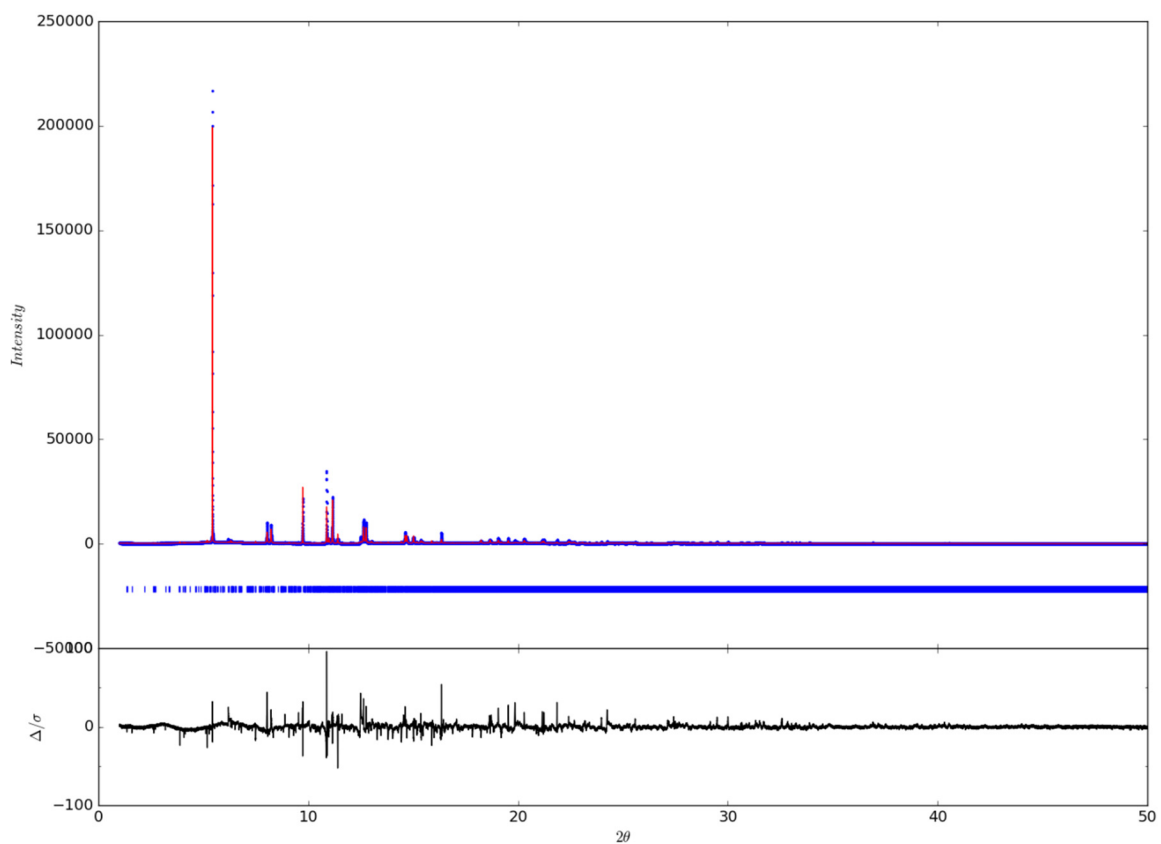

**Figure S6.** Rietveld refinement plot of synchrotron X-ray powder diffractogram of  $RT(t)$ - $\text{Li}_{1+x}\text{NiB}$  ( $P1$ ) collected at 295 K (experimental powder pattern is in blue, calculated – in red, difference – in black,  $R_B = 0.15$ ,  $R_p = 0.13$ ,  $G.O.F. = 3.88$ ).

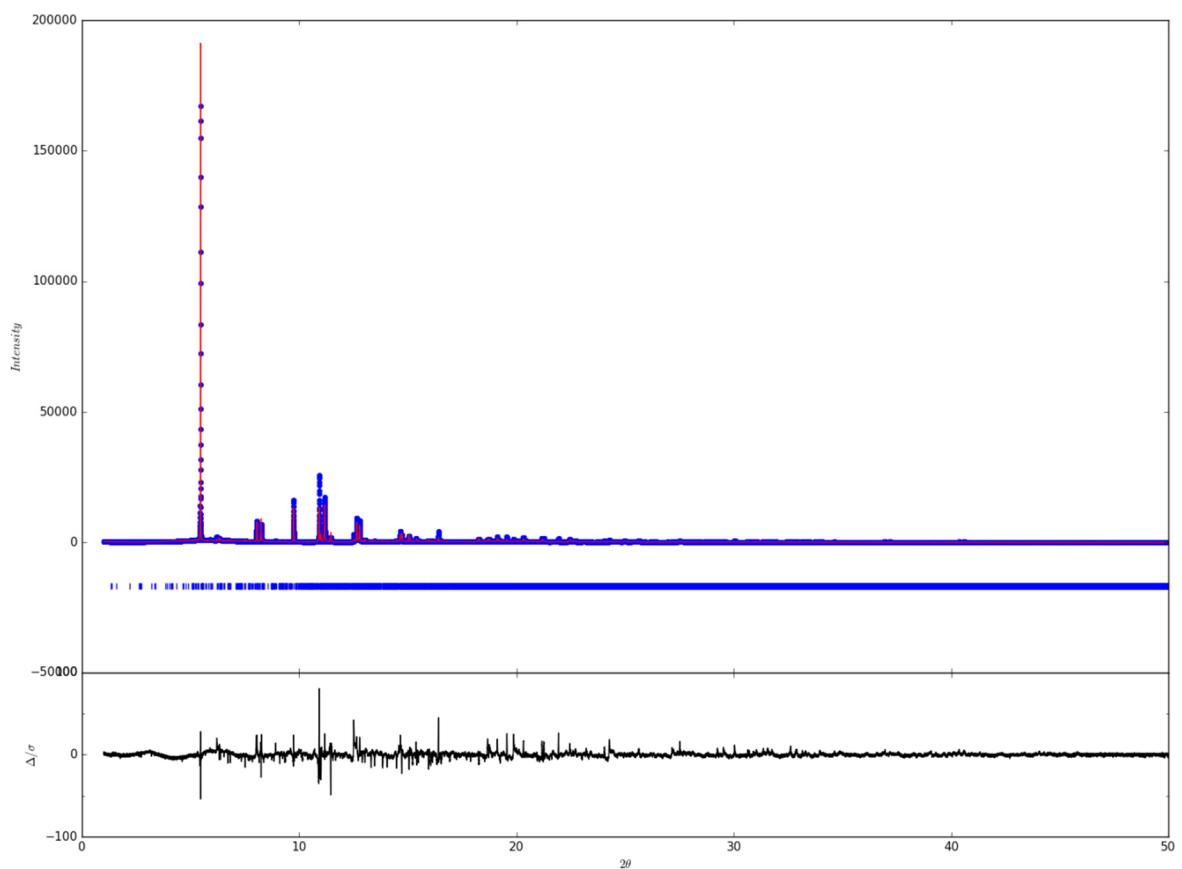

**Figure S7.** Rietveld refinement plot of synchrotron X-ray powder diffractogram of  $RT(t)$ - $\text{Li}_{1+x}\text{NiB}$  ( $P1$ ) collected at 100 K (experimental powder pattern is in blue, calculated – in red, difference – in black,  $R_B = 0.14$ ,  $R_p = 0.12$ ,  $G.O.F. = 3.64$ ).

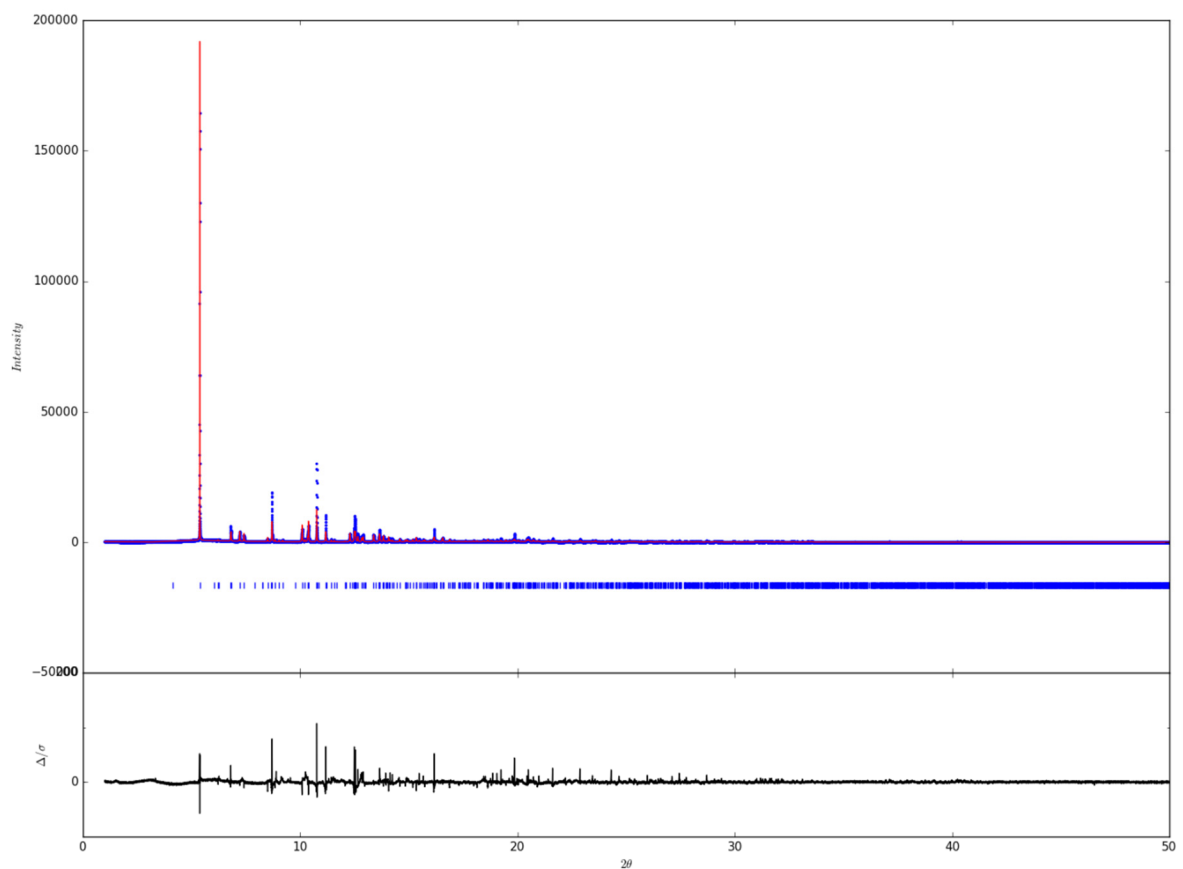

**Figure S8.** Rietveld refinement plot of synchrotron X-ray powder diffractogram of  $HT(m)$ - $Li_{1+y}NiB$  ( $P2_1/c$ ) collected at 295 K (experimental powder pattern is in blue, calculated – in red, difference – in black,  $R_B = 0.16$ ,  $R_p = 0.11$ ,  $G.O.F. = 3.46$ ).



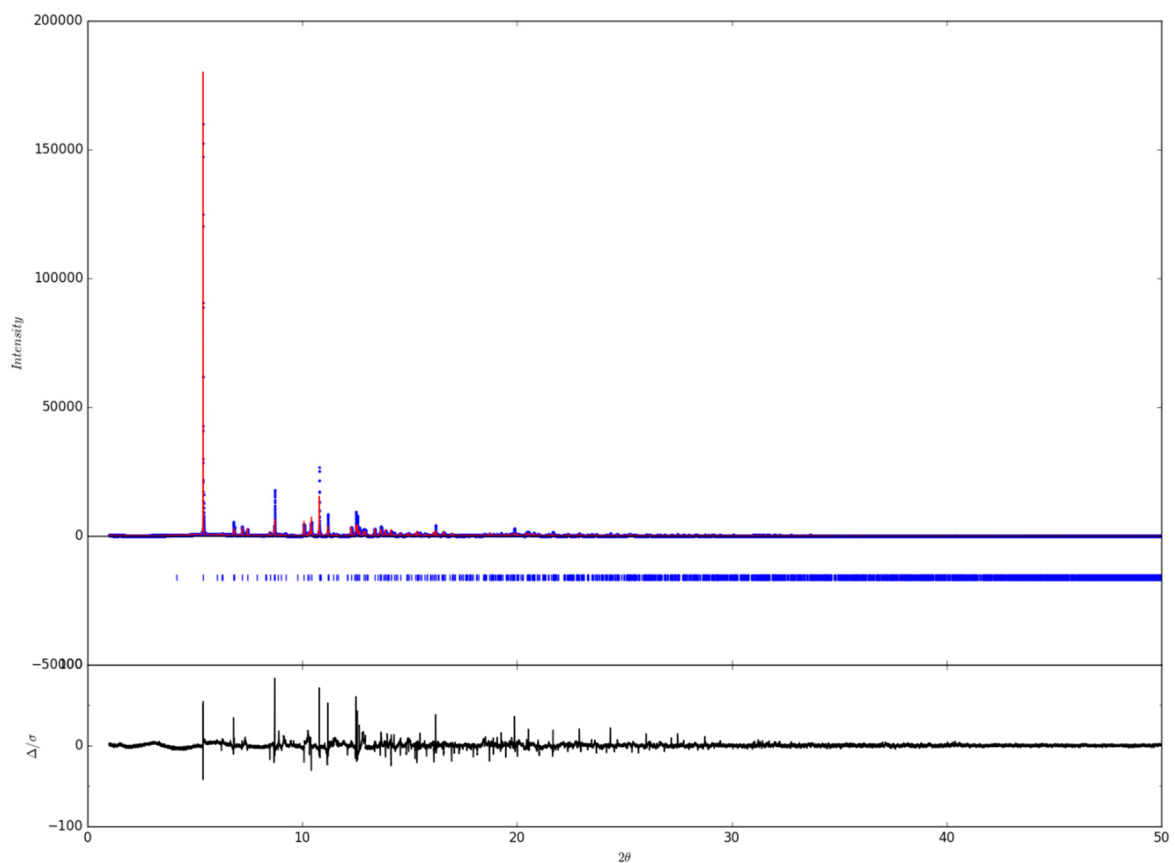

**Figure S9.** Rietveld refinement plot of synchrotron X-ray powder diffractogram of  $HT(m)\text{-Li}_{1+y}\text{NiB}$  ( $P2_1/c$ ) collected at 100 K (experimental powder pattern is in blue, calculated – in red, difference – in black,  $R_B = 0.16$ ,  $R_p = 0.12$ ,  $G.O.F. = 3.44$ ).

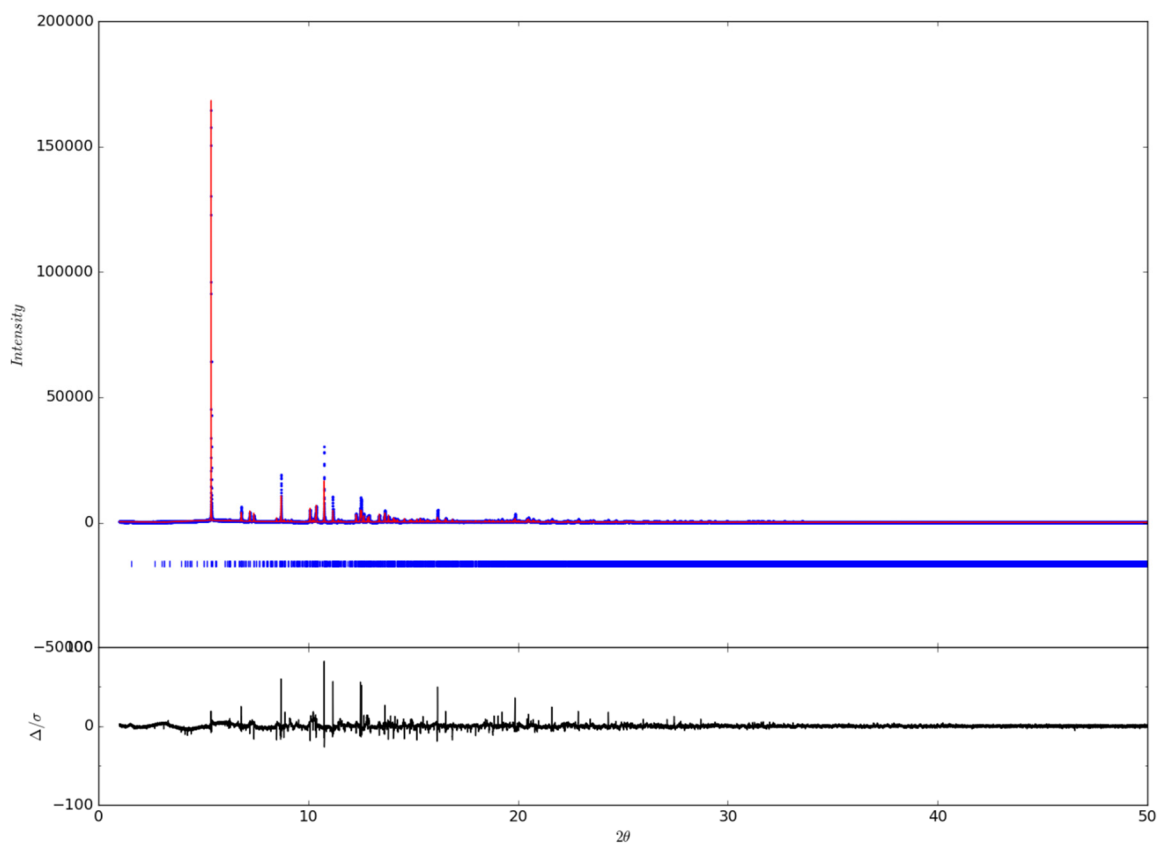

**Figure S10.** Rietveld refinement plot of synchrotron X-ray powder diffractogram of  $HT(t)\text{-Li}_{1+y}\text{NiB}$  (P1) collected at 295 K (experimental powder pattern is in blue, calculated – in red, difference – in black,  $R_B = 0.12$ ,  $R_p = 0.10$ ,  $G.O.F. = 2.98$ ).

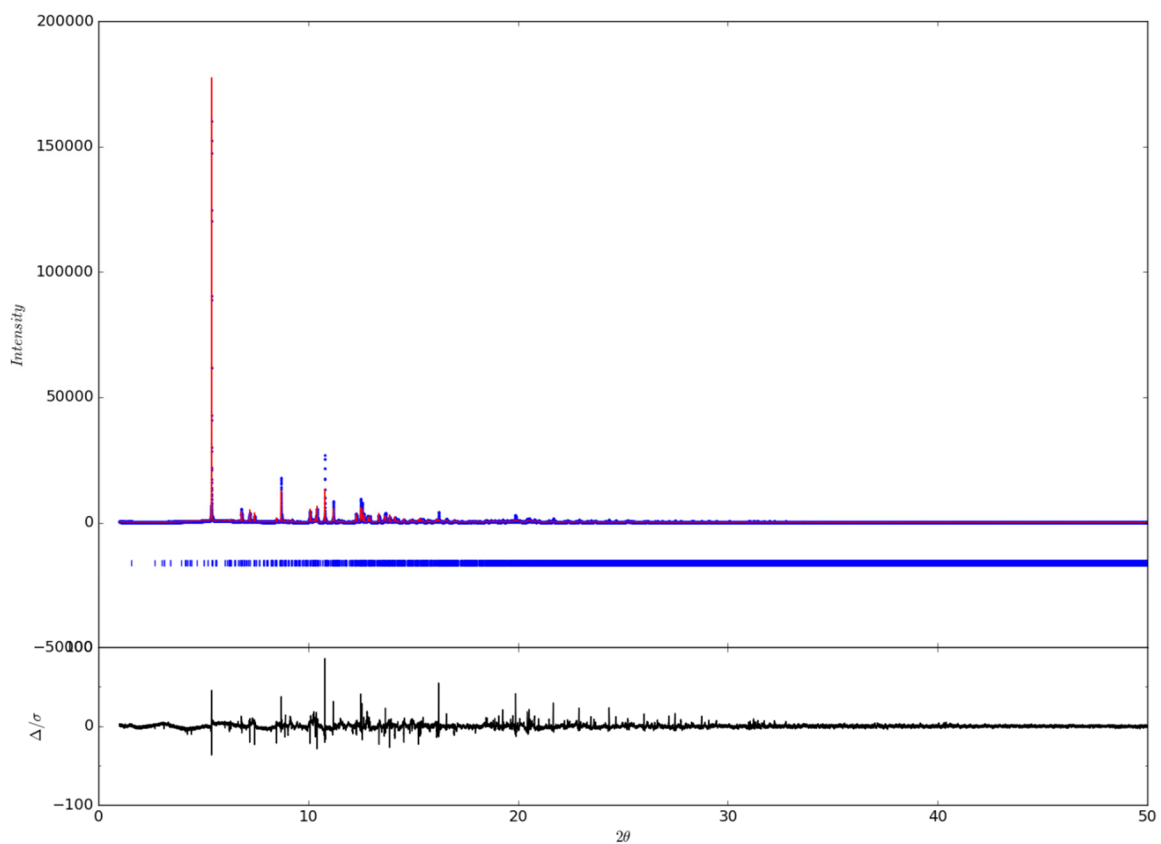

**Figure S11.** Rietveld refinement plot of synchrotron X-ray powder diffractogram of  $HT(t)\text{-Li}_{1+y}\text{NiB}$  (P1) collected at 100 K (experimental powder pattern is in blue, calculated – in red, difference – in black,  $R_B = 0.14$ ,  $R_p = 0.13$ ,  $G.O.F. = 3.32$ ).

**Table S7.** Atomic coordinates and isotropic equivalent displacement parameters of the distorted *HT*-LiNiB phase at 616 K. Refined parameters based on synchrotron powder X-ray diffraction data at 616 K are listed (17-BM APS).

| <i>HT</i> -LiNiB ( <i>mP</i> 24, <i>P</i> 2 <sub>1</sub> / <i>m</i> , <i>a</i> = 3.9248(2), <i>b</i> = 8.9024(5), <i>c</i> = 7.5549(4) Å, $\beta$ = 90.023(9)°, <i>Z</i> = 8, <i>R</i> <sub>p</sub> = 0.07, <i>R</i> <sub>B</sub> = 0.10, <i>G.O.F.</i> = 11.7) |              |          |          |          |                                                            |
|-----------------------------------------------------------------------------------------------------------------------------------------------------------------------------------------------------------------------------------------------------------------|--------------|----------|----------|----------|------------------------------------------------------------|
| Site                                                                                                                                                                                                                                                            | Wyckoff site | <i>x</i> | <i>y</i> | <i>z</i> | <i>U</i> <sub>iso</sub> , Å <sup>2</sup> × 10 <sup>2</sup> |
| Ni1                                                                                                                                                                                                                                                             | 2 <i>e</i>   | 0.469(2) | 1/4      | 0.509(1) | 0.2(1)                                                     |
| Ni2                                                                                                                                                                                                                                                             | 2 <i>e</i>   | 0.662(2) | 1/4      | 0.045(1) | 0.2(1)                                                     |
| Ni3                                                                                                                                                                                                                                                             | 2 <i>e</i>   | 0.890(2) | 1/4      | 0.741(1) | 0.2(1)                                                     |
| Ni4                                                                                                                                                                                                                                                             | 2 <i>e</i>   | 0.155(2) | 1/4      | 0.232(1) | 0.2(1)                                                     |
| B1                                                                                                                                                                                                                                                              | 2 <i>e</i>   | 0.18740  | 1/4      | 0.00301  | 3.8(6)                                                     |
| B2                                                                                                                                                                                                                                                              | 2 <i>e</i>   | 0.44764  | 1/4      | 0.82447  | 3.8(6)                                                     |
| B3                                                                                                                                                                                                                                                              | 2 <i>e</i>   | 0.94503  | 1/4      | 0.50314  | 3.8(6)                                                     |
| B4                                                                                                                                                                                                                                                              | 2 <i>e</i>   | 0.68411  | 1/4      | 0.32477  | 3.8(6)                                                     |
| Li1                                                                                                                                                                                                                                                             | 2 <i>a</i>   | 0        | 0        | 0        | 3.8(6)                                                     |
| Li2                                                                                                                                                                                                                                                             | 2 <i>c</i>   | 0        | 0        | 1/2      | 3.8(6)                                                     |
| Li3                                                                                                                                                                                                                                                             | 4 <i>f</i>   | 0.49420  | 0.50150  | 0.25054  | 3.8(6)                                                     |

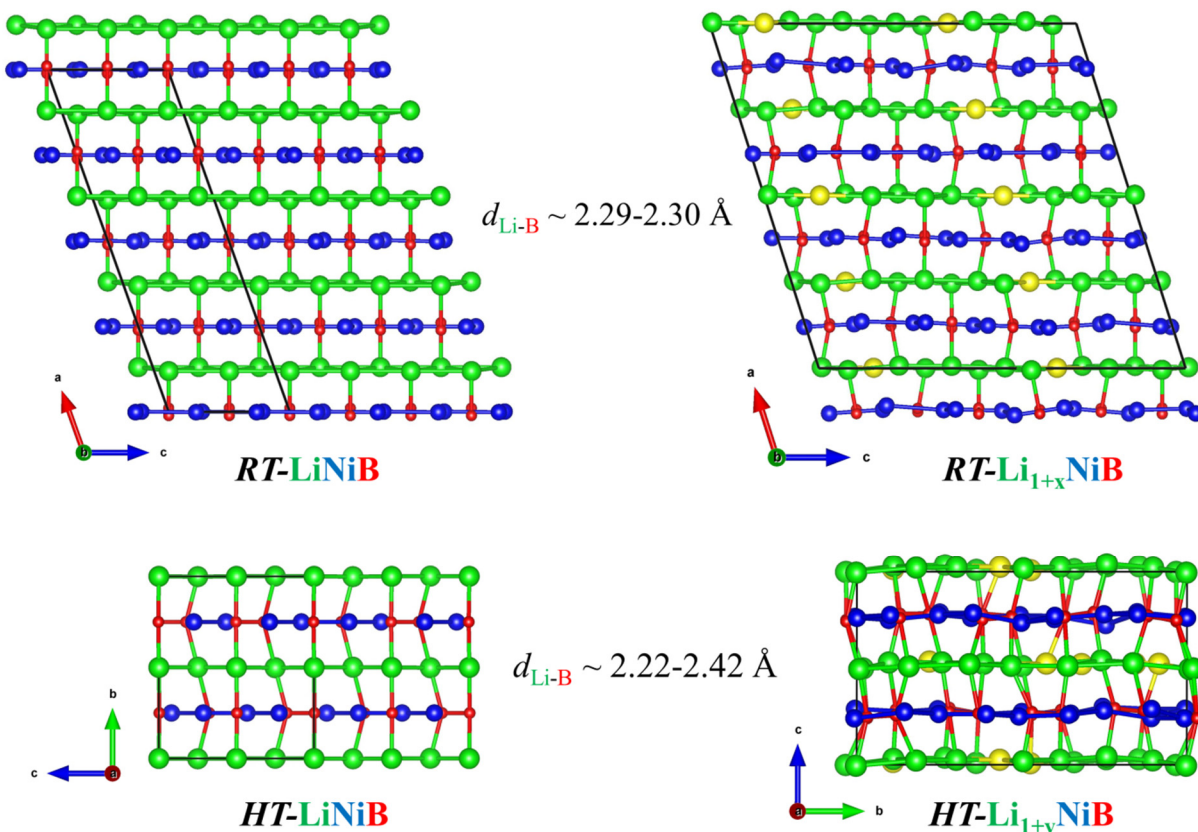

**Figure S12.** Comparison of the Li-B distances in the structures of parent *RT*-LiNiB, *HT*-LiNiB and Li-enriched *RT*-Li<sub>1+x</sub>NiB and *HT*-Li<sub>1+y</sub>NiB polymorphs. Only the bonds within the given cutoff are shown. In the structure of *RT*-LiNiB each Li atom is connected to one B atom ( $d_{\text{Li-B}} \sim 2.29-2.30 \text{ \AA}$ ), while in the structures of *HT*-LiNiB each Li is connected to two B atoms ( $d_{\text{Li-B}} \sim 2.22-2.42 \text{ \AA}$ ). The coordination of most of the Li by B atoms in the Li-enriched *RT*-Li<sub>1+x</sub>NiB and *HT*-Li<sub>1+y</sub>NiB polymorphs is similar to that in parent compounds. However, in the structure of *RT*-Li<sub>1+x</sub>NiB a few Li atoms (shown in yellow) have longer distances ( $\sim 2.31-2.35 \text{ \AA}$ ) to the adjacent B atoms. Similarly, in the structure of *HT*-Li<sub>1+y</sub>NiB polymorph a small fraction of Li atoms (shown on yellow) has longer distances to adjacent B atoms ( $2.43-2.59 \text{ \AA}$ ).

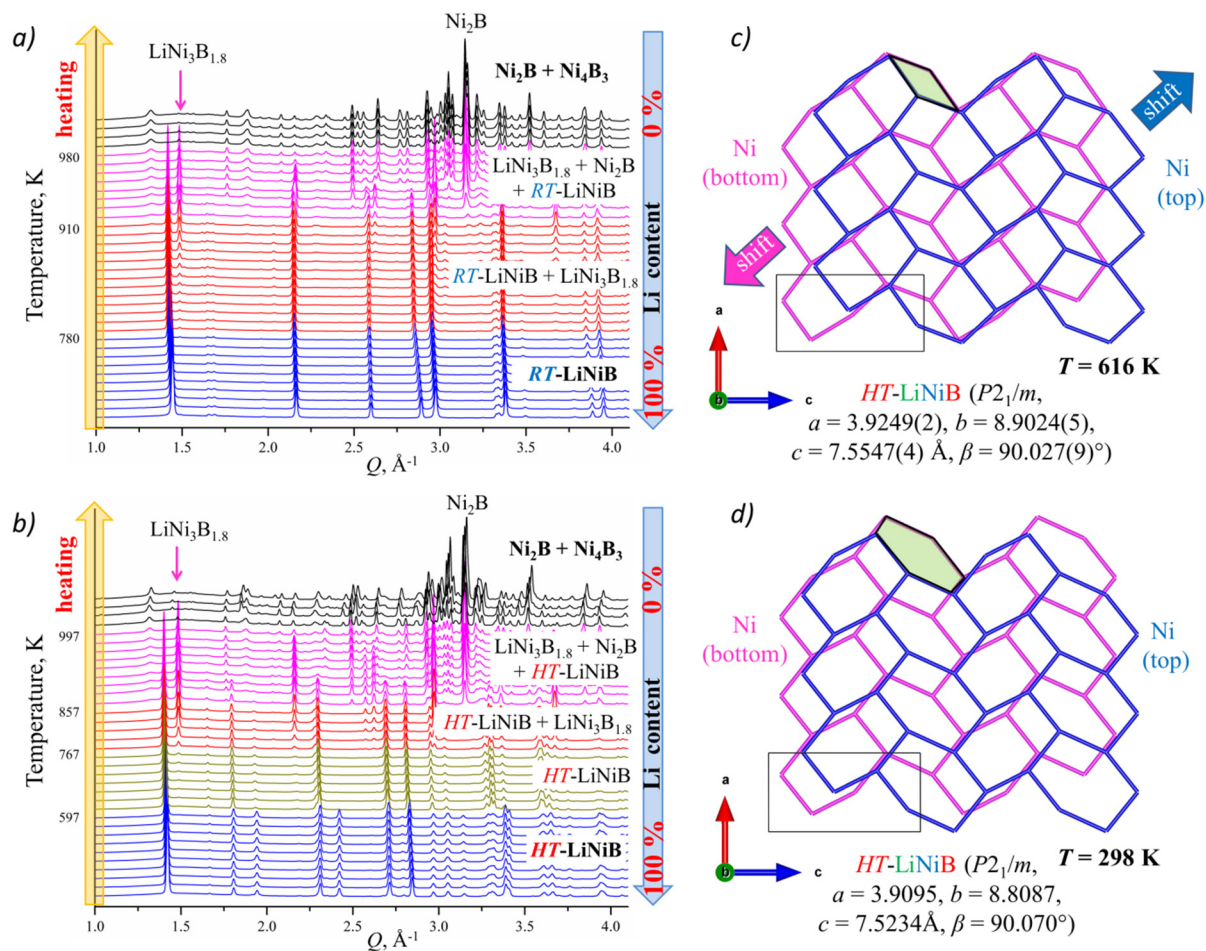

**Figure S13.** High-temperature *in-situ* X-ray diffraction patterns showing the temperature-driven structural transformation of *RT*-LiNiB (a) and *HT*-LiNiB (b) compounds. With the increase of temperature Li is being partially leached from the *RT*-LiNiB compound because of reaction with capillary material ( $\text{SiO}_2$ ) resulting in  $\text{RT-LiNiB} \rightarrow \text{LiNi}_3\text{B}_{1.8} \rightarrow \text{Ni}_2\text{B}$  and  $\text{Ni}_4\text{B}_3$  transformations. b) *HT*-LiNiB transforms to its distorted variant above 597 K, and further transformations  $\text{HT-LiNiB} \rightarrow \text{LiNi}_3\text{B}_{1.8} \rightarrow \text{Ni}_2\text{B}$  and  $\text{Ni}_4\text{B}_3$  occur at higher temperatures. c) and d) –difference in the structures of [NiB] layers in *HT*-LiNiB and its distorted variant at 616 K.

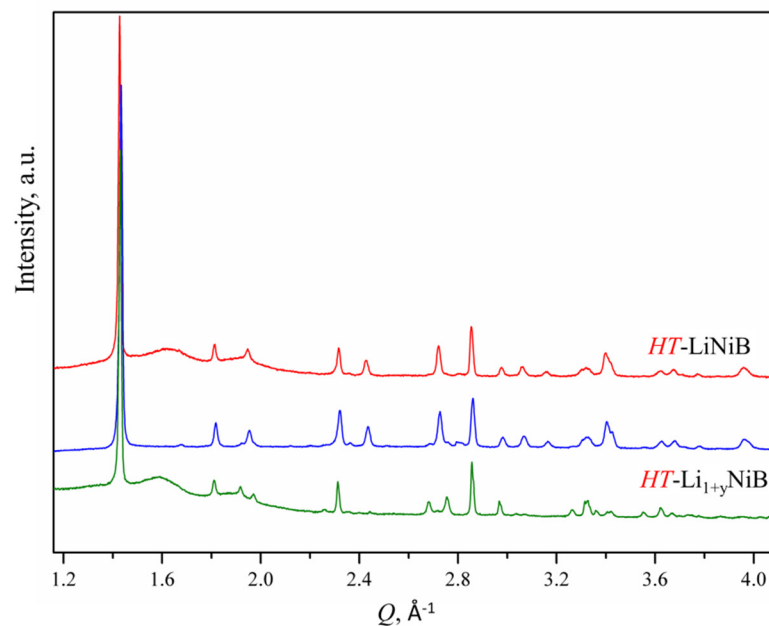

**Figure S14.**  $HT\text{-Li}_{1+y}\text{NiB}$  rapidly transforms in air into  $HT\text{-LiNiB}$ , as evident from the comparison of X-ray powder diffraction patterns of  $HT\text{-Li}_{1+y}\text{NiB}$  (green – in air sensitive holder, blue – in open holder) and  $HT\text{-LiNiB}$  (red) compounds. Air sensitive holders provide to the “amorphous” background at  $\sim 1.6 Q$  and  $1.9 Q$ .

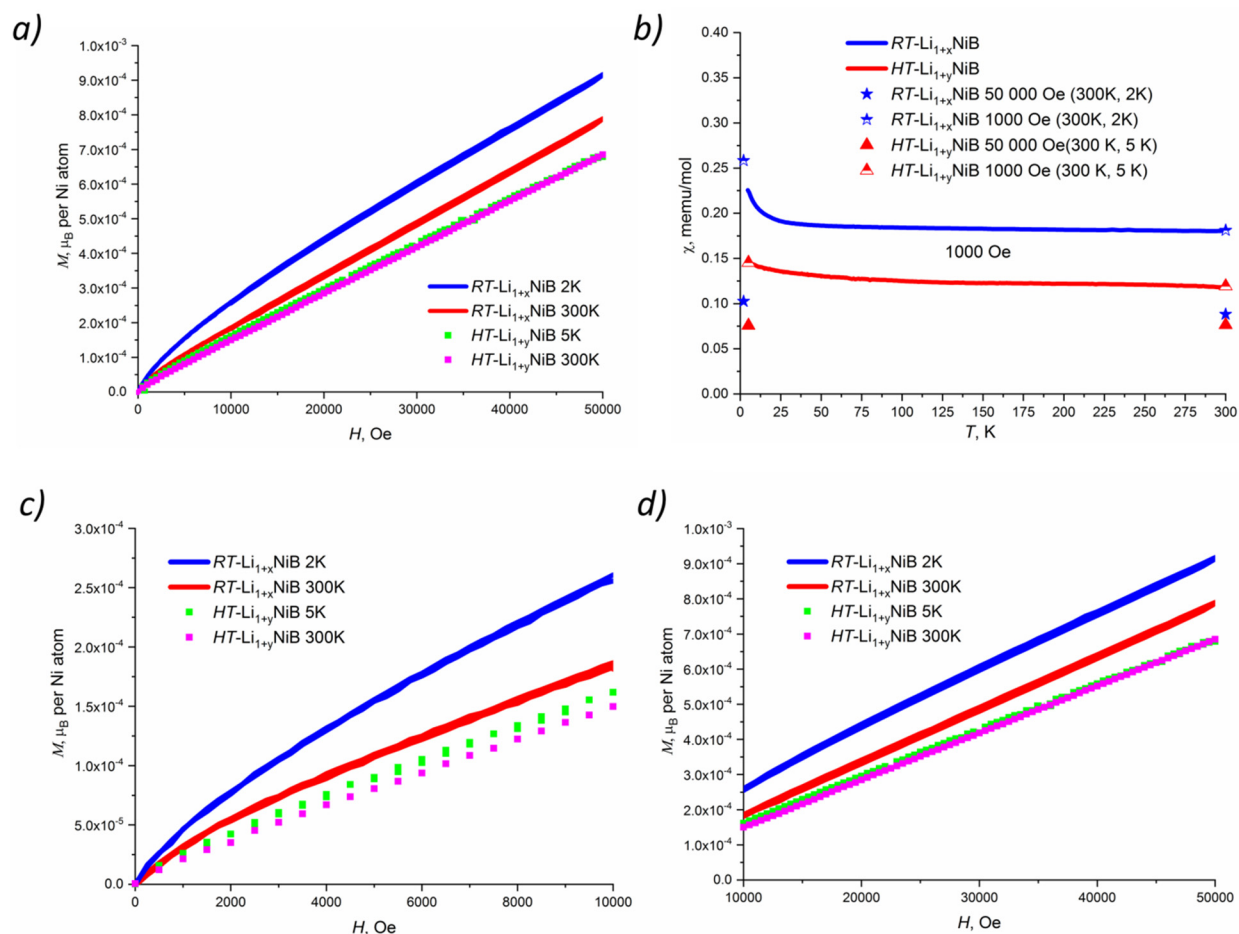

**Figure S15.** Temperature dependence of magnetization per Ni atom vs magnetic field (a) and magnetic susceptibility  $\chi$  vs.  $T$  (b) of  $RT-Li_{1+x}NiB$  and  $HT-Li_{1+y}NiB$  polycrystalline samples. A small deviation from the linearity of the  $M(H)$  data at low magnetic fields (c), the most pronounced in the  $RT-Li_{1+x}NiB$  sample at 2 K, could be attributed to some magnetic moment bearing impurity, concentration of which is under the detection limit of X-ray analysis (below 1 %). As a result of this impurity, the 1000 Oe  $\chi(T)$  data that is shown for the  $RT-Li_{1+x}NiB$  phase (b) is contaminated by this impurity signal. As such, we have added four additional sets of data points (b) inferred from the  $M(H)$  plots to the  $\chi(T)$  data for the  $RT-Li_{1+x}NiB$  phase (star symbols) and  $HT-Li_{1+y}NiB$  phase (triangle symbols). One set is from the 1000 Oe value of the  $M(H)$  plot, and the other is from the higher field (50000 Oe) slope of the  $M(H)$  plot. These data points provide an estimate of the intrinsic magnetic susceptibility  $\chi(T)$  for  $RT-Li_{1+x}NiB$  and  $HT-Li_{1+y}NiB$  phases to be in the range of  $0.7-1.2 \times 10^{-4} \text{ emu} \cdot \text{mol}^{-1}$ . Temperature dependence of magnetization per Ni atom vs magnetic field at 10000-50000 Oe is linear as shown in (d).
